# Supplementary material for: Enhancement of alkaline water splitting activity by Co–P coating on a copper oxide nanowire
Source: Royal Society of Chemistry journal article supplement (doi:10.1039/c8dt04419h), 2018-11-30
Supplement: c8dt04419h1.pdf [file c8dt04419h1.pdf]

## Electronic Supplementary Information

### **Enhancement of alkaline water splitting activity by Co-P alloy coating on copper oxide nanowire**

Bing Chang,<sup>a</sup> Yingchun Yang,<sup>\*a</sup> Zhixiang Ye<sup>a</sup> and Shengyu Liu<sup>a</sup>

<sup>a</sup> College of Resources and Environment, Chengdu University of Information Technology, Chengdu 610225, China

\* Corresponding Author: E-mail: yangyingchun@cuit.edu.cn

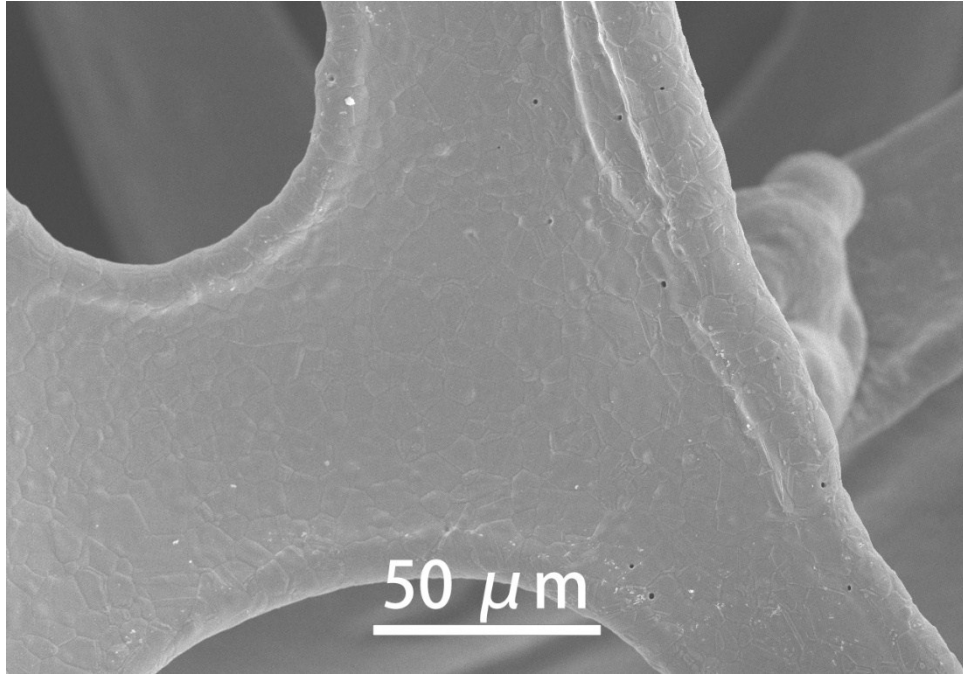

**Fig. S1.** SEM image of bare CF.

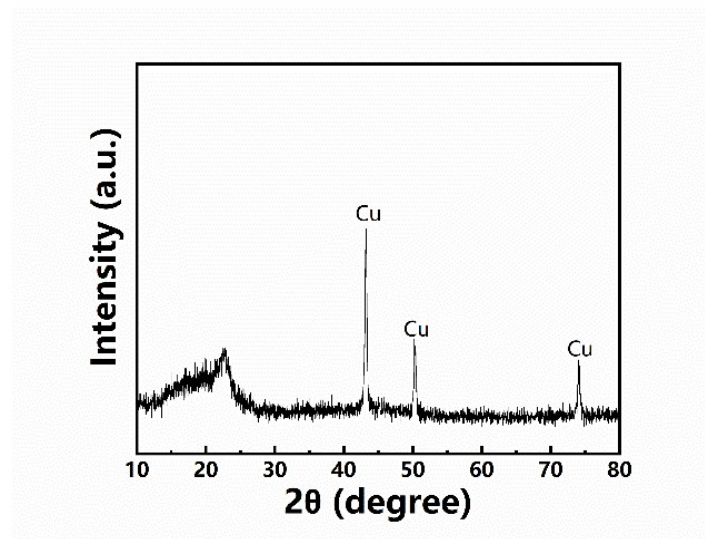

**Fig. S2.** XRD pattern of Co-P /CF (Co-P electrodeposit on bare CF).

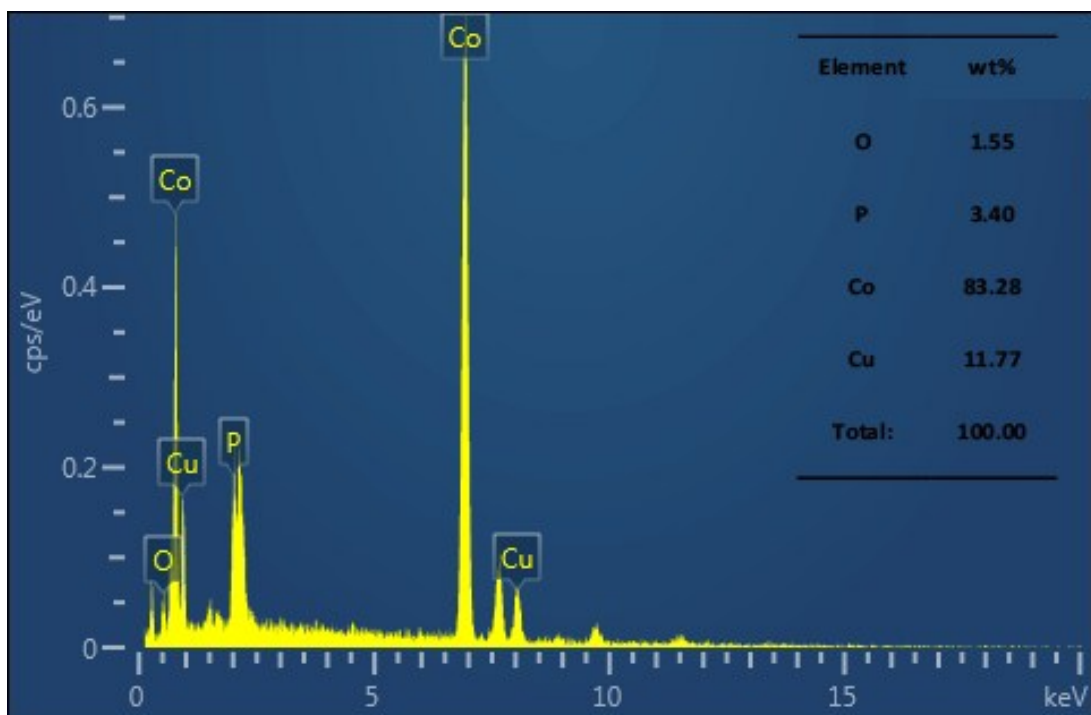

Fig. S3. EDX spectrum of Co-P/CuO CF.

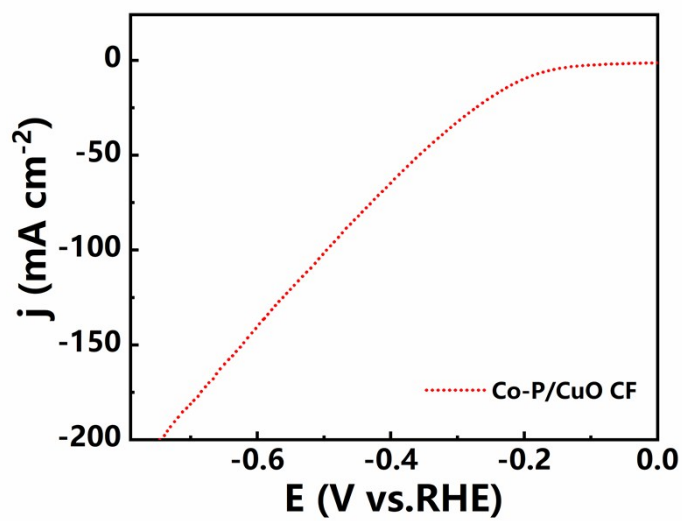

Fig. S4. HER performance of Co-P/CuO CF in 0.1 M PBS (pH=7.0).

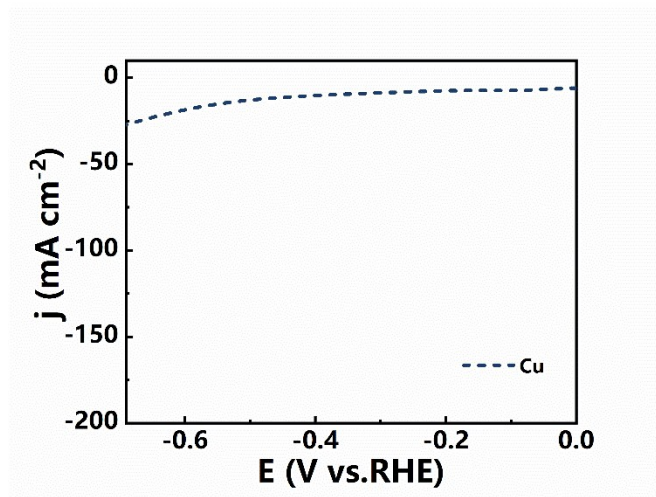

Fig. S5. HER performance of Cu foam in 1.0 M KOH.

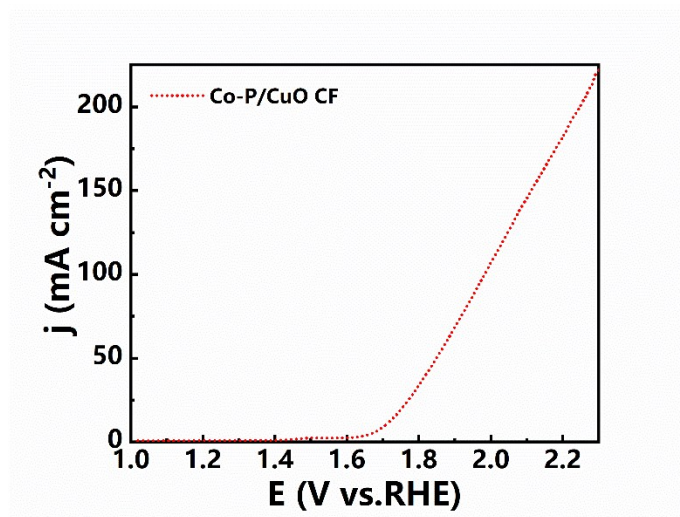

Fig. S6. OER performance of Co-P/CuO CF in 0.1 M PBS (pH=7.0).

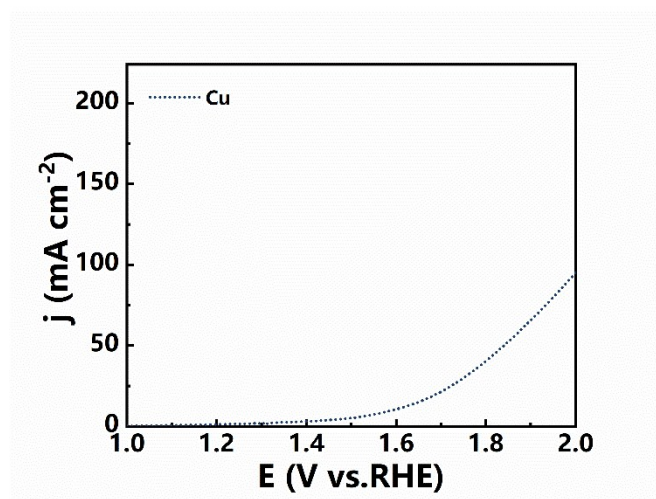

Fig. S7. OER performance of Cu foam in 1.0 M KOH.

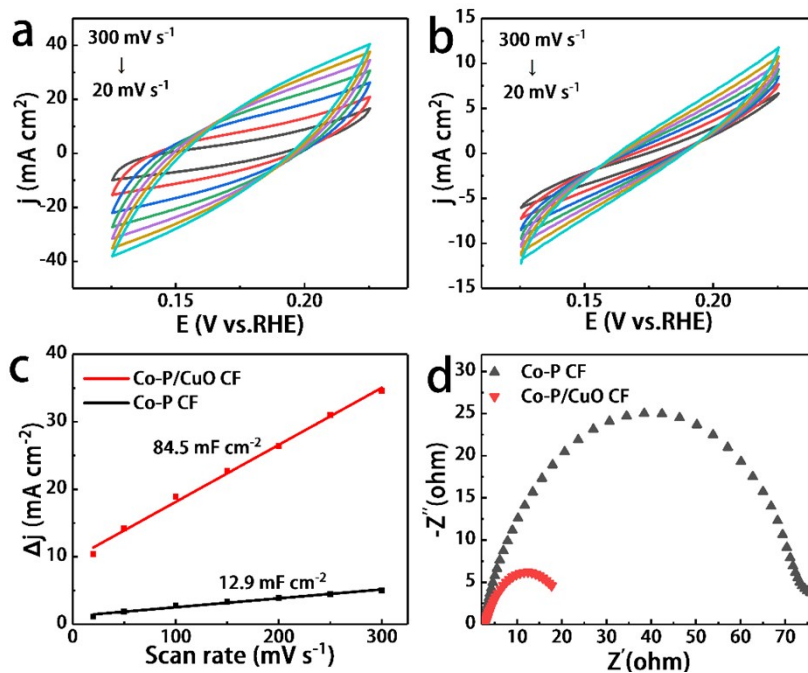

**Fig. S8.** CV curves for Co-P/CuO CF (a) and Co-P CF (b) at different scan rates: 20, 50, 100, 150, 200, 250 and 300  $\text{mV s}^{-1}$  from inside to outside. (c) Capacitive current at 0.175 V (vs. RHE) as a function of the scan rate for Co-P/CuO CF and Co-P CF ( $\Delta j = j_a - j_c$ ). (d) Nyquist plots for Co-P/CuO CF and Co-P CF in frequency of 0.1-100 KHz.

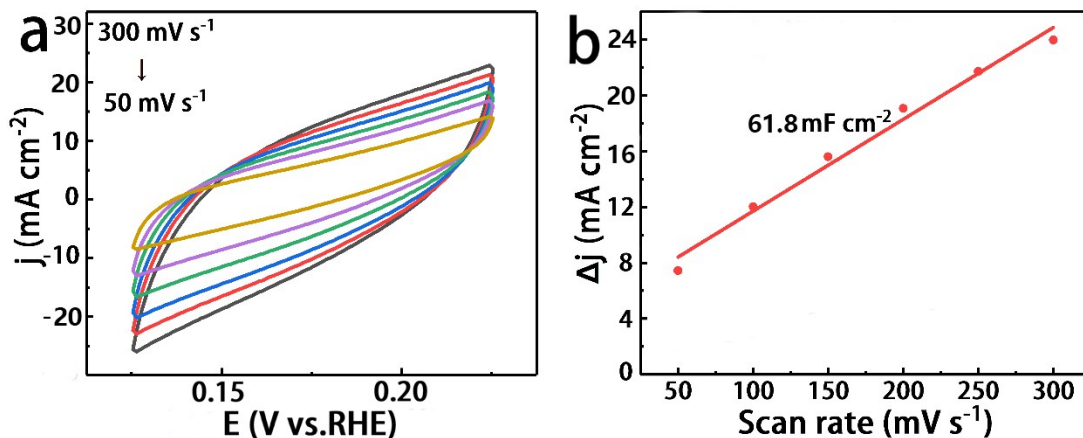

**Fig. S9.** (a) CV curves of Co-P/CuO CF after 30 h water electrolysis. (b) Corresponding pattern of scan rate vs.  $\Delta j$ .

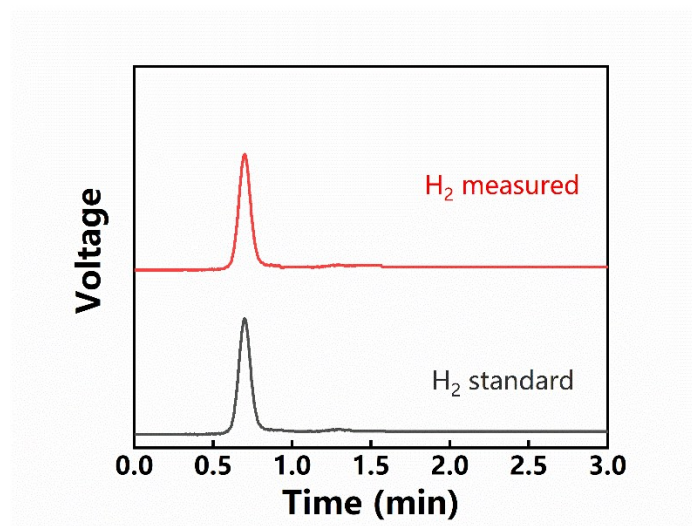

**Fig. S10.** GC patterns of H<sub>2</sub> production and H<sub>2</sub> standard gas (99%).

**Table S1.** Comparison of HER performance for Co-P/CuO CF with other non-noble-metal electrocatalysts in alkaline media.

| Catalyst                              | $j$ (mA cm <sup>-2</sup> ) | $\eta$ (mV) | Refs.     |
|---------------------------------------|----------------------------|-------------|-----------|
| Co-P/CuO CF                           | 20                         | 95          | This work |
|                                       | 50                         | 102         |           |
|                                       | 100                        | 112         |           |
| Co-P film                             | 10                         | 94          | 1         |
| Co-S/FTO                              | 10                         | 480         | 2         |
| Co-NRCNTs                             | 10                         | 370         | 3         |
|                                       | 20                         | >450        |           |
| CoMnO@CN                              | 28                         | 100         | 4         |
| CoO <sub>x</sub> @CN                  | 10                         | 232         | 5         |
| Co@N-C                                | 10                         | 210         | 6         |
| CoP/CC                                | 10                         | 209         | 7         |
| Ni-Co-S/CF                            | 10                         | 140         | 8         |
| WP NA/CC                              | 10                         | 150         | 9         |
| WP <sub>2</sub> submicroparticles     | 10                         | 153         | 10        |
| NiCo PBA nanocubes                    | 10                         | 150         | 11        |
| Ni@NiO/Cr <sub>2</sub> O <sub>3</sub> | 100                        | 150         | 12        |
| U-CNT-900                             | 10                         | 240         | 13        |
| Co-NRCNT                              | 10                         | 370         | 14        |
| MoC <sub>x</sub> nano-octahedrons     | 10                         | 150         | 15        |
| MoS <sub>2</sub> @Ni/CC               | 10                         | 91          | 16        |
|                                       | 100                        | 196         |           |

**Table S2.** Comparison of OER performance for Co-P/CuO CF with other non-noble-metal electrocatalysts in alkaline media.

| Catalyst                              | $j$ (mA cm <sup>-2</sup> ) | $\eta$ (mV) | Refs.     |
|---------------------------------------|----------------------------|-------------|-----------|
| Co-P/CuO CF                           | 10                         | 259         | This work |
|                                       | 20                         | 292         |           |
|                                       | 50                         | 329         |           |
| Co-P foam                             | 10                         | 300         | 17        |
| Co-P film                             | 10                         | 345         | 18        |
| NiCo LDH                              | 10                         | 367         | 19        |
| CoCo LDH                              | 10                         | 393         | 20        |
| Co <sub>3</sub> O <sub>4</sub> /rm-GO | 10                         | 310         | 21        |
| CoxOy/NC                              | 10                         | 430         | 22        |
| CoMn LDH                              | 10                         | 324         | 23        |
| CoO/NG                                | 10                         | 340         | 24        |
| NiFeO <sub>x</sub> film               | 10                         | 350         | 25        |
| Amorphous NiO                         | 20                         | >470        | 26        |
| NiO <sub>x</sub> /C                   | 10                         | 335         | 27        |



1. N. Jiang, B. You, M. Sheng and Y. Sun, *Angew. Chem. Int. Ed.*, 2015, **54**, 6251-6254.
2. Y. Sun, C. Liu, D. C. Grauer, J. Yano, J. R. Long, P. Yang and C. J. Chang, *J. Am. Chem. Soc.*, 2013, **135**, 17699-17702.
3. X. Zou, X. Huang, A. Goswami, R. Silva, B. R. Sathe, R. Mikmeková and T. Asefa, *Angew. Chem. Int. Ed.*, 2014, **53**, 4372-4376.
4. J. Li, Y. Wang, T. Zhou, H. Zhang, X. Sun, J. Tang, L. Zhang, A. M. Al-Enizi, Z. Yang and G. Zheng, *J. Am. Chem. Soc.*, 2015, **137**, 14305-14312.
5. H. Jin, J. Wang, D. Su, Z. Wei, Z. Pang and Y. Wang, *J. Am. Chem. Soc.*, 2015, **137**, 2688-2694.
6. J. Wang, D. Gao, G. Wang, S. Miao, H. Wu and J. Li, X. Bao, *J. Mater. Chem. A.*, 2014, **2**, 20067-20074.
7. J. Tian, Q. Liu, A.M. Asiri and X. Sun, *J. Am. Chem. Soc.*, 2014, **136**, 7587-7590.
8. T Liu, X Sun, A. M. Asiri and Y He, *Int. J. Hydrogen Energy*, 2016, **41**, 7264-7269.
9. Z. Pu, Q. Liu, A. M. Asiri and X. Sun, *ACS Appl. Mater. Interfaces.*, 2014, **6**, 21874-21879.
10. Z. Xing, Q. Liu, A. M. Asiri and X. Sun, *ACS Catal.*, 2015, **5**, 145-149.
11. Y. Feng, X.-Y. Yu and U. Paik, *Chem. Commun.*, 2016, **52**, 1633-1636.
12. M. Gong, W. Zhou, M. J. Kenney, R. Kapusta, S. Cowley, Y. Wu, B. Lu, M. Lin, D. Wang, J. Yang, B. Hwang and H. Dai, *Angew. Chem. Int. Ed.*, 2015, **127**, 12157-12161.
13. S. Gao, G. Li, Y. Liu, H. Chen, L. Feng, Y. Wang, M. Yang, D. Wang, S. Wang and X. Zou, *Nanoscale*, 2015, **7**, 2306-2316.
14. X. Zou, X. Huang, A. Goswami, R. Silva, B. R. Sathe, E. Mikmekova and T. Asefa, *Angew. Chem. Int. Ed.*, 2014, **53**, 4372-4376.
15. H. Wu, B. Xia, L. Yu, X. Yu and X. Lou, *Nat. Commun.*, 2015, **6**, 6512.
16. Z Xing, X Yang, A. M. Asiri and X Sun, *ACS Appl. Mater. Interfaces.*, 2016, **8**, 14521-14526.
17. S. Oh, H. Kim, Y. Kwon, M. Kim, E. Cho and H. Kwon, *J. Mater. Chem. A*, 2016, **4**, 18272-18277
18. Y. Yang, H. Fei, G. Ruan and J. M. Tour, *Adv. Mater.*, 2015, **27**, 3175-3180.
19. H. Liang, F. Meng, M. Cabán-Acevedo, L. Li, A. Forticaux, L. Xiu, Z. Wang and S. Jin, *Nano Lett.*, 2015, **15**, 1421-1427.
20. F. Song and X. Hu<sup>1</sup>, *Nat. Commun.*, 2014, **5**, 4477-4485.
21. Y. Liang, Y. Li, H. Wang, J. Zhou, J. Wang, T. Regier and H. Dai, *Nat. Mater.*, 2011, **10**, 780-786.
22. J. Masa, W. Xia, I. Sinev, A. Zhao, Z. Sun, S. Grtzke, P. Weide, M. Muhler and W. Schuhmann, *Angew. Chem. Int. Ed.*, 2014, **53**, 8508-8512.
23. F. Song and X. Hu, *J. Am. Chem. Soc.*, 2014, **136**, 16481-16484.
24. S. Mao, Z. Wen, T. Huang and Y. Houa, *J. Chem. Energy Environ. Sci.*, 2014, **7**, 609-616.
25. Charles C. L. McCrory, Suho Jung, Jonas C. Peters and Thomas F. Jaramillo, *J. Am. Chem. Soc.*, 2013, **135**, 16977-16987.
26. L. Kuai, J. Geng, C. Chen, E. Kan, Y. Liu, Q. Wang and B. Geng, *Angew. Chem. Int. Ed.*, 2014, **53**, 7547-7551.

27. Y. Qiu, L. Xin and W. Li, *Langmuir*, 2014, **30**, 7893–7901.
